# Supplementary material for: Reflections and a mendelian randomization analysis of patients with vitiligo and pancreatic cancer
Source: Research Square preprint supplement (doi:10.21203/rs.3.rs-6197588/v1), 2025-03-17
Supplement: Supplementary file 1 [file 834a15bb0eadc1aeffadf42e.docx]

| **Outcome** | **Exposure** | **Egger_intercept** | **SE** | **P** |
| --- | --- | --- | --- | --- |
| PC | vitiligo | 0.017 | 0.040 | 0.666 |

**Table S1. MR-Egger test**
